# Supplementary material
Source: ML conference proceedings conference paper supplement (https://aclanthology.org/D11-1037)
Supplement: Attachment [file D11-1037.Attachment.gz]

# Parser Evaluation over Local and Non-Local Deep Dependencies in Large Corpora: Supplementary Materials

Table 1 provides the numerical data underlying the graph in Figure 3 of the main paper.

| Phenomena |   |     | Parsers |      |      |      |      |      |      | Average |
|-----------|---|-----|---------|------|------|------|------|------|------|---------|
|           |   | N   | Enju    | XLE  | C&J  | C&C  | Stan | MST  | RASP |         |
| vger      | A | 112 | 0.85    | 0.79 | 0.89 | 0.93 | 0.91 | 0.84 | 0.06 | 0.75    |
|           | B | 113 | 0.91    | 0.67 | 0.88 | 0.91 | 0.89 | 0.78 | 0.64 | 0.81    |
| vpart     | A | 112 | 0.88    | 0.76 | 0.88 | 0.81 | 0.85 | 0.75 | 0.84 | 0.82    |
|           | B | 112 | 0.79    | 0.62 | 0.80 | 0.61 | 0.74 | 0.50 | 0.57 | 0.66    |
| control   | A | 118 | 0.72    | 0.75 | 0.86 | 0.86 | 0.84 | 0.92 | 0.85 | 0.83    |
|           | B | 110 | 0.85    | 0.75 | 0.62 | 0.75 | 0.59 | 0.00 | 0.09 | 0.52    |
| argadj    | A | 102 | 0.78    | 0.61 | 0.67 | 0.78 | 0.71 | 0.81 | 0.02 | 0.63    |
|           | B | 115 | 0.55    | 0.30 | 0.40 | 0.45 | 0.28 | 0.50 | 0.20 | 0.38    |
| barerel   | A | 106 | 0.21    | 0.68 | 0.75 | 0.68 | 0.34 | 0.70 | 0.55 | 0.56    |
|           | B | 104 | 0.58    | 0.67 | 0.55 | 0.62 | 0.22 | 0.10 | 0.08 | 0.40    |
| rnr       | A | 108 | 0.78    | 0.61 | 0.75 | 0.70 | 0.80 | 0.75 | 0.48 | 0.70    |
|           | B | 115 | 0.08    | 0.31 | 0.08 | 0.30 | 0.06 | 0.08 | 0.03 | 0.14    |
| tough     | A | 109 | 0.80    | 0.51 | 0.42 | 0.20 | 0.78 | 0.85 | 0.70 | 0.61    |
|           | B | 109 | 0.65    | 0.59 | 0.01 | 0.01 | 0.01 | 0.01 | 0.01 | 0.18    |
| ned       | A | 112 | 0.71    | 0.65 | 0.64 | 0.71 | 0.62 | 0.66 | 0.56 | 0.65    |
|           | B | 110 | 0.05    | 0.45 | 0.06 | 0.05 | 0.09 | 0.03 | 0.02 | 0.11    |
| absol     | A | 109 | 0.66    | 0.45 | 0.86 | 0.45 | 0.60 | 0.70 | 0.47 | 0.60    |
|           | B | 110 | 0.04    | 0.07 | 0.20 | 0.22 | 0.21 | 0.18 | 0.01 | 0.13    |
| itexpl    | A | 141 | 0.50    | 0.70 | 0.31 | 0.26 | 0.30 | 0.30 | 0.15 | 0.36    |
| Average   |   |     | 2127    | 0.60 | 0.58 | 0.56 | 0.54 | 0.52 | 0.50 | 0.33    |

Table 1: Parser recall per dependency type
